# Supplementary material for: The Embryonic Key Pluripotent Factor NANOG Mediates Glioblastoma Cell Migration via the SDF1/CXCR4 Pathway
Source: MDPI journal article supplement (doi:10.3390/ijms221910620), 2021-09-30
Supplement: s1 [file s1]

**Supplementary Table S2**

| Medaka oligo sequences | KpnI/NotI/4xNanog binding site/TATA/KpnI |   |          |          |          |          |          |          |       |    |
|------------------------|------------------------------------------|---|----------|----------|----------|----------|----------|----------|-------|----|
| 1.4xNanog+             | 5'                                       | C | GCGGCCGC | TTAATCTC | TTAATCTC | TTAATCTC | TTAATCTC | TATAAA   | GGTAC | 3' |
| 1.4xNanog-             | 5'                                       | C | TTTATA   | GAGATTAA | GAGATTAA | GAGATTAA | GAGATTAA | GCGGCCGC | GGTAC | 3' |
| 1.4xNanog.m+           | 5'                                       | C | GCGGCCGC | TTCCTCTC | TTCCTCTC | TTCCTCTC | TTCCTCTC | TATAAA   | GGTAC | 3' |
| 1.4xNanog.m-           | 5'                                       | C | TTTATA   | GAGAGGAA | GAGAGGAA | GAGAGGAA | GAGAGGAA | GCGGCCGC | GGTAC | 3' |
| 2.4xNanog+             | 5'                                       | C | GCGGCCGC | CAGATTAA | CAGATTAA | CAGATTAA | CAGATTAA | TATAAA   | GGTAC | 3' |
| 2.4xNanog-             | 5'                                       | C | TTTATA   | TTAATCTG | TTAATCTG | TTAATCTG | TTAATCTG | GCGGCCGC | GGTAC | 3' |
| 2.4xNanog.m+           | 5'                                       | C | GCGGCCGC | CAGACCAA | CAGACCAA | CAGACCAA | CAGACCAA | TATAAA   | GGTAC | 3' |
| 2.4xNanog.m-           | 5'                                       | C | TTTATA   | TTGGTCTG | TTGGTCTG | TTGGTCTG | TTGGTCTG | GCGGCCGC | GGTAC | 3' |
| 3.4xNanog+             | 5'                                       | C | GCGGCCGC | CACATTAA | CACATTAA | CACATTAA | CACATTAA | TATAAA   | GGTAC | 3' |
| 3.4xNanog-             | 5'                                       | C | TTTATA   | TTAATGTG | TTAATGTG | TTAATGTG | TTAATGTG | GCGGCCGC | GGTAC | 3' |
| 3.4xNanog.m+           | 5'                                       | C | GCGGCCGC | CACACCAA | CACACCAA | CACACCAA | CACACCAA | TATAAA   | GGTAC | 3' |
| 3.4xNanog.m-           | 5'                                       | C | TTTATA   | TTGGTGTG | TTGGTGTG | TTGGTGTG | TTGGTGTG | GCGGCCGC | GGTAC | 3' |
