# Supplementary material for: The Embryonic Key Pluripotent Factor NANOG Mediates Glioblastoma Cell Migration via the SDF1/CXCR4 Pathway
Source: MDPI journal article supplement (doi:10.3390/ijms221910620), 2021-09-30
Supplement: s1 [file s1]

**Supplementary Table S1**

|                                             | <b>Forward primer</b>  | <b>Reverse primer</b>  | <b>Product length bp</b> | <b>Fragment position</b>     |
|---------------------------------------------|------------------------|------------------------|--------------------------|------------------------------|
| <b><i>Ol-Nanog</i> regulatory region</b>    | CTGCATGGTTTGCCTTC      | TGCATAAATGGTGTGCATGG   | 168                      | chr20:10,397,140-10,398,200  |
| <b><i>Ol-Nanog</i> no regulatory region</b> | TCTGGCTCCAACATGGCG     | ATGAGGCGGCAATCAACG     | 236                      | chr20:10,400,500-10,401,300  |
| <b><i>Ol-Oct4</i> regulatory region</b>     | TTATTGTTCTGATGTGAAAAGG | AAACCCTTCTGCTTTCAG     | 245                      | chr12:15,547,100-15,548,500  |
| <b><i>Ol-Oct4</i> no regulatory region</b>  | GGAATCAGGGCAGAATTC     | CTGTCAACACTGATCTGGG    | 260                      | chr12:15,545,240-15,546,530  |
| <b><i>Ol-Sall1</i> regulatory region</b>    | GTGTGTGATGAAAACGTG     | GCATTAAGATTGTTGTAATTCG | 254                      | chr3:29,316,100-29,316,950   |
| <b><i>Ol-Sall1</i> no regulatory region</b> | CATATGACTTCTGCTGTGTCC  | AGCAAAAAGATGTGAAAACCC  | 147                      | chr3:29,313,900-29,314,450   |
| <b><i>Ol-Sall4</i> regulatory region</b>    | TGCCATGAAGGACGAAAG     | TTGCGATTTATCACGAGC     | 182                      | chr7:25,177,400-25,177,850   |
| <b><i>Ol-Sall4</i> no regulatory region</b> | ACCAAGACTCGTCAACTGG    | TCACCAAACCTGGGAATCAC   | 267                      | chr7:25,174,741-25,175,642   |
| <b><i>Ol-p53</i> regulatory region</b>      | CTTTGGTAACATAACTCTGG   | CTGCATTTAGTTGGAGTCAC   | 170                      | chr: 18. 14431941 - 14432606 |
| <b><i>Ol-p53</i> no regulatory region</b>   | GGGTATGTGAGTGAAAAGG    | TGTATATTGAAGCCGTGC     | 236                      | chr: 18. 14446500-14447000   |

Oligo sequences used for ChIP amplification.
