# Supplementary material for: The Embryonic Key Pluripotent Factor NANOG Mediates Glioblastoma Cell Migration via the SDF1/CXCR4 Pathway
Source: MDPI journal article supplement (doi:10.3390/ijms221910620), 2021-09-30
Supplement: s1 [file s1]

## Supplementary Figure S2

Putative NANOG binding sequences in the *Hs-CXCR4* gene. A) Putative NANOG binding sequences: Highlighted in green Genomatix MatInspector and in bold blue according to the motif (G/C) N (G/T) AA (G/T) (G/C). B) Comparison of the human CXCR4 putative NANOG binding DNA sequence with those reported in mouse *Rex-1* and human *CDK6* and *CDC25A* genes. Highlighted in green equal in all sequences and highlighted in yellow equal to the CXCR4 sequence.

A)

>CxCR4 upstream sequence. ENSEMBLE Genomic location: Chromosome 2  
136875621 to 136877022 (+)

```
GGTCCGTGTGCGACGCACGCGCCTCGGTCCCAGTATCTCCGACGCGGCCACCCGCGCTGCGGACGCAGTTTCTCGGCCCCGCCC  
CACACTCGCTCCCCCGCCCCACCCAGTCTCCGCGCCGGAGGGAAGTGGCGCGAGGGGGAAGCACTGTCTGCGCGCCCACTGCAAA  
CCTCAGCCAGTCTGAGATCGCTTTAAACGTCTGACCCCCACCCCACTCCGCCCCGCCAGTTCTTCAACCTAATTTCTGATTCGT  
GCCAAAGCTTGTCCTCTGCTCAAAATCGTGGAAGACGCCGAGTATGGGGACCGAAGACCTGGGTTCAAGCCCGGCTTGGAAATCCCT  
GCCCATCCCTGGCATTTTCATCTCTCCGGGCTTATTGCTGGTTTCTCCGAATGCGGGCCTTGCTCTGGTTACGCTGGATCCCAAC  
GCCTAGAACAGTGCCTGGCAGCAGTTCGTCTTCTATAAATATCGGACTAAATGCATCTCTGTGATGGTAATACCCACACGGTGT  
TGTGAGAATGAATGAGTGATTCGTGCAAGTTCCTAGTGATCTGTTACAAAAGTACTGGTCGCTAAATTACTCTTATAATAAAGC  
ATACTTTTAGGATAATAAAGCACTATTCGCGAATTGGTTACCGCTATTATGAAATTACTGAGCAATACATATCTACATCTGATCAG  
TCTCCAGAATTATGCCAAATCCTACCTTCTCTGAAAGTATCTCCTAATTATCTGCACCTGACCCTAGTGAAGCTGTGAATGTGCA  
AGTA TAGCTACATCCTCCGAAGGAAGGATCTTTACTCCTTTTACCTCTGAATGGGCTGCGTCTGCTGAAAGCGCGGGGAATGGCG  
TTGGAAGCTTGGCCCTACTTCCAGCATTGCCGCTACTGGTTGGGTTACTCCAGCAAGTCACTCCCTTCCCTGGGCTCAGTGTC  
TCTACTGTAGCATTCAGGTCTGGAATTCATCCACTTTAGCAAGGATGGACGCGCCACAGAGAGACGCGTTCTAGCCCCGCGCT  
TCCCACCTGTCTTCAGGCGCATCCCGCTTCCCTCAAACCTAGGAAATGCCTCTGGGAGGTCTGTCCGGCTCCGACTCACTACCG  
ACCACCCGAAACAGCAGGTCCCTGGGCTTCCCAAGCGCGCACCTCTCCGCCCCGCCCTGCGCCCTCCTTCCCTCGCGTCT  
GCCCCTCTCCCCACCCCGCCTTCTCCCTCCCCGCCCCAGCGGCGCATGCGCCGCGCTCGGAGCGTGTTTTTATAA  
AAGTCCGCGCGCGCCAGAACTTCAGTTTGTGGCTGCGGCAGCAGGTAGCAAAGTGACGCCGAGGGCCTGAGTG  
CTCCAGTAGCCACCGCATCTGGAGAACCAGCGGTTACCATGGAGGGGA
```

B)

|                 |                             |
|-----------------|-----------------------------|
| <i>h-CXCR4</i>  | CCTGAATGGGCTGCGTCTGCTGAAG   |
| <i>m-Rex-1</i>  | AGTTATGCAAAATGCCCTTCAAGATC  |
| <i>h-CDK6</i>   | CTGCTTCTTTATGGATCCACTTAATA  |
| <i>h-CDC25A</i> | AGCCAGGCCGCGCTTTCGCGGTAAATA |
