# Supplementary material for: The Embryonic Key Pluripotent Factor NANOG Mediates Glioblastoma Cell Migration via the SDF1/CXCR4 Pathway
Source: MDPI journal article supplement (doi:10.3390/ijms221910620), 2021-09-30
Supplement: s1 [file s1]

**Supplementary Table S4**

| <b>HsCxcr4 mut 2</b> | <b>Primer Sequence (5' to 3'). Mut 2</b>  |
|----------------------|-------------------------------------------|
| HsCxcr4 mut 2 +      | 5'-cctgaatgggctgcgtctgctcggagcgcggggaa-3' |
| HsCxcr4 mut 2 -      | 5'-ttccccgcgctcggagcagacgcagcccattcagg-3' |

  

| <b>HsCxcr4 mut 1+2</b> | <b>Primer Sequence (5' to 3'). Mut1 + Mut2</b> |
|------------------------|------------------------------------------------|
| HsCxcr4 mut 1+2 +      | 5'-cctgtccaggctgcgtctgctcggagcgcggggaa-3'      |
| HsCxcr4 mut 1+2 -      | 5'-ttccccgcgctcggagcagacgcagcctggacagg-3'      |
