# Supplementary material for: The Embryonic Key Pluripotent Factor NANOG Mediates Glioblastoma Cell Migration via the SDF1/CXCR4 Pathway
Source: MDPI journal article supplement (doi:10.3390/ijms221910620), 2021-09-30
Supplement: s1 [file s1]

**Supplementary Table S3**

| Human oligo sequences | KpnI/NotI/Nanog binding site/TATA/KpnI                                                  |
|-----------------------|-----------------------------------------------------------------------------------------|
| HsCxcr4 promotor+     | 5' <b>CGCGGCCGC</b> CCTGAATGGGCTGCGTCTGCTGAAAGTATAAA <b>GGTAC</b> 3'                    |
| HsCxcr4 promotor-     | 5' <b>CTTTATA</b> CTTTCAGCAGACGCAGCCCATT <b>CAGG</b> <b>CGCGGCCGC</b> <b>GGTAC</b> 3'   |
| Human oligo sequences | kpnI/NotI/Sequence mut 1/TATA/KpnI                                                      |
| HsCxcr4 mut 1+        | 5' <b>CGCGGCCGC</b> CCTG <b>TCC</b> AGGCTGCGTCTGCTGAAAGTATAAA <b>GGTAC</b> 3'           |
| HsCxcr4 mut1 -        | 5' <b>CTTTATA</b> CTTTCAGCAGACGCAGCCT <b>TGGAC</b> AGG <b>CGCGGCCGC</b> <b>GGTAC</b> 3' |
