# Supplementary material for: The Embryonic Key Pluripotent Factor NANOG Mediates Glioblastoma Cell Migration via the SDF1/CXCR4 Pathway
Source: MDPI journal article supplement (doi:10.3390/ijms221910620), 2021-09-30
Supplement: s1 [file s1]

Putative Nanog binding sequences in the *Ol-Cxcr4b* gene upstream region were Ol-Nanog binding was previously demonstrated by ChIP assay (Sánchez-Sánchez et al., 2010). In blue, bold and underlined putative Nanog binding sequences 1-3. (G/A) (G/C) ATTA (G/AT) (GC). Underlined only pairs of primers that amplified bands in the ChIP experiment performed in Sánchez-Sánchez et al., 2010.

CAGCGCCGAAGGTCGGCCTTGCCGAGGTTCTGCCGACAGGTTTCTTCTTTGTCTTTTATTATG  
 TGGAAGCCGTTTCTCCCCACAGTCGCCAGCTGCTGTTTTCCAGACAAAAGTGAATGAA  
 ACCCTGCAGGACTATTTTAAAAATAAAATCAAGACATTTTAGCCTCATCAGAAAGATCTG  
 GCCTGAGTTGGATCAAAATAATCCTAATTATTGAATTATTA AACACATGATGTGTTAAT  
 GCAGTGAATGATTCGATTTTAGGCCCAAAAGTGACCTTAGATTATCAACACCCACCTTT  
 GAAAAACACACAAAGTCAGCGTGCTACTAAACAACTAAGTGCCCTGCACCAAGTTTGTAT  
 CTGAAAAAGAAAAAATTTGAAGCTTTGAGTCTGACTGTACACGGAATAATGATCTCATCTT  
 TTGGTTGCGCTTTGGAATTGCTCATTCTTGTC **TTAATCTC** AATGCCGCTGCCTCTTTTC  
 ATGGCCATTCTTCACTCAAGAGGCCCTTTTCGCTGCCGTTACACTCCTGGCGATTGTG  
 TTTGAAGTGGGTGCTGATCTTTTGATTCTGGACTGATAGCGATCTGAGTCCTTGGGCT  
 CACGCAGGAGCTCCAGGTATGCAACCTCCAGGAGTTCATGTGGAACTGAAGTCTGCTCT  
 GTTGAAACTCAGTGAAATGATGAGCTAAAAACCCACAAAACATCAAAAGCTAATTGCGTA  
 GTGAGCTGATTGACAGAGCTGATTATGCTGCATTTATTACAGATTATAAGCAGAAC  
 ACAAATACTCTTGAGCTTGAGAAAACGTGAACACGTTGTGAAACGTTTATTGCAATAAAC  
 ATGCACTTTTCTCTTTAAAAACTCTGACTTTTAAGTATCTGGCCCTTTAATCATTGCAA  
 CCTCCCAACTCCAACAGATTTATTTGAATTTAAAGGAAATCATGACAAAACCTGAAATG  
 GATAGAAACATTCACATGCTCAGAAGGCATGTGCCAGAGAACAACTTAAAAACAGAAA  
 TTTTCTCTTCTCAGGACATAAAATTAAACAAAATGCTGCGCATAATT **CAGATTAA** AAGT  
 GACGGCTTTGGCTCAGCGCAGGTACAGCAGCAACTGCTGTGCTGTAATGCCATTGATAA  
 GAGCCTCATCCCCATACAGTGGCCCTTTCTGAGCTGCCACCTCTCTGGGTTTCTCTTTC  
 TTGGACTGCAGGGGTTCTCGAACGACTCCTCCAACGCTTTGATAAGCAGCAGCTGATTT  
 AGAAGCAGCGGTGTGCGGTTGCTGCCTGTCAATTGTTGCTCGTTATTTATGGCAAACCA  
 ACAAAATGTTGTGGTTTTTTGTAATGAAGCAACAGTCTCTGAGCACCAGTGTTTGTGCCTCA  
 CGTCTTCTCAGGAAAGGGAAAAATGTTCTTCTGGGGGGGGGATTTCAGACTTCAGCACCTG  
 GCTGAACAGAAAAAGAACTCTATGATGTCTAGAGAGCATTCGGAAGAAAACCCACAAC  
 ACCAATGGACTTTCTGATTCAACCAATCATTTTCAAAACGTTCCAGTTCAATGAACAC  
 CCATAATGCACCTGCAATACTTTCACTGCAAAAACAGCGAGCCTACAATAGGAAAAAGAAC  
 TCTAATCTTAAAGAGTCACTGGAAAGTAGTGAGATGATCTGTCCGTGCTGAAGGTCATT  
 TTTACAGAACAAGCAATCTCATAATAAGAAATCAAAATAGGTTCCATGCAAGCACTCAAT  
 ACGTACGCTAAAGAATCTGTTAGAGTTCTTCAAACCTGAATATTCTGCAGCCCAAAAATAA  
 GTATTTTTCCACTTGAAAGCAAACGGTTTGTAATTTATTTGTGGTGTTGTTGAGTTTTTA  
 TGGACCTAATAGGATTAAGTCTCAAAATCACTAGTGATGAGTGGAAATTAATCATTTTTT  
 AGAAATAAATGTGGACAAAATGAGAATTAAAGATCTATTGAAAAAATCTAAAAATCACCAC  
 TTATTTTTTGAACGTAATTCTACATTTTTTCCCCCTAAAAATAATGACAAGGAATGCCAGTC  
 TAATTCAATCAACATTTGTTGAACTCTGAAATAACATCCTTAAATCTTTGTTTAATATCT  
 GAAGCAAGAATTCAGTGTAATTCAGTTTTTTTTGAGAATTATATCAAGGTTTTCTATTG  
 CCAAGAGTTTGAGGCCAAAGGATTTGGACTAATTTCTCTAGTTCCTCATGATTAGAGA  
 GAAGCCTGGAAAGGTGTGTAGCAGACAGAGAAGTTAAACAACCTTCAAACCTGCTGAAACATC  
 TTGTTGGTCCGTTTTGAAGTCTTGCCCGTATCATCACTTTTTATGAAGCAGGGTGTC  
 TTATCGATGAATCCCATTCTAAAGGCGATGTCTGCTGCTAAATCTTGAACCAACTTTTCA  
 CACATTGACTCGGCTGAGGAAGGAAATCGCAAAAAGGCAATTTGATCTTTTTTTTTGTGTC  
 AAAGCTTCGTGCTGGAATGGTGATCTCTCCTTGTTCCAACGTGGATGAACAGATCCC  
 AATGATCTATCATATATCAAGGCATTGAGGGGCGTTTGCATGCCACATGGAGGATATTG  
 AGTTTTGAAATTAGAGTCGGGTGCAGAGTTGGCCCCCTGGTCACAGACAGAGAGCTGCCT  
 GACATCAACCC **CACATTAA** AAGGTTTCATTAACAACTTTGGAGCGCAGACATGTAGTTGA  
 GAAGTGAGAGTGAGGTGGGGAGAGAAAAAAGGTGAGGCGATGTGGAACGCCCTCTGACA  
 GAAGAGGAGTGGAGGAAGGTGAGGAAGGTGAAGCTGCCAGGAAGGTGAGGCTCCAGAAA

GGTGAGGCTGCCAGGAAGCTGTCCTTCCGTCCGCCTGCAAGAGCCAGAGCTCCTGAAATC  
CTGTGAATGCCCCAAAACCTTCCAAACAGAGCATCTTCAAAGCTATTGCCTTTTGTCTG  
ATCTAAATTCCTGCTAAAATGAAAAAACTCTAAAGCTGCAGAGAAGAACTTCTTTGGA  
GGCATAAAAACAAAACCTCACGTTTTTTTCTCAGCGCATTGCTGGTTTTGGACGCCAG  
GAGATGGCAGACGCCTCCAGCTCTGACTGACAGGACAGAGCGGCACAAAGAGACGCCCC  
TCGCACGCGCCTTTTATACTGCAGCCGTTTTTTGGAGCGCGGTGGGCGGGGCCAGGGGCC  
CCGCGCGGGGACCGTACTTATTCAGACAAACAACCTGAACGGCTCATTCTGCACTCATCC  
TGACGGAGGGACACCGGCAGCGACCATC
